# Supplementary material
Source: publisher figshare collection journal article supplement (https://acs.figshare.com/ndownloader/files/12123296)
Supplement: Supplementary file 1 [file 12123296]

**Supporting Information for**  
**”Self-Assembled Chiral Photonic Crystal from a Colloidal Helix Racemate”**

Qun-li Lei<sup>1,2</sup>, Ran Ni<sup>2,†</sup> and Yu-qiang Ma<sup>1,†</sup>

<sup>1</sup> *National Laboratory of Solid State Microstructures and Department of Physics,  
Collaborative Innovation Center of Advanced Microstructures,  
Nanjing University, Nanjing 210093, China*

<sup>2</sup> *School of Chemical and Biomedical Engineering,  
Nanyang Technological University,  
62, Nanyang Drive, 637459, Singapore*

<sup>†</sup> *E-mail: r.ni@ntu.edu.sg (R. N.); myqiang@nju.edu.cn (Y. M.)*

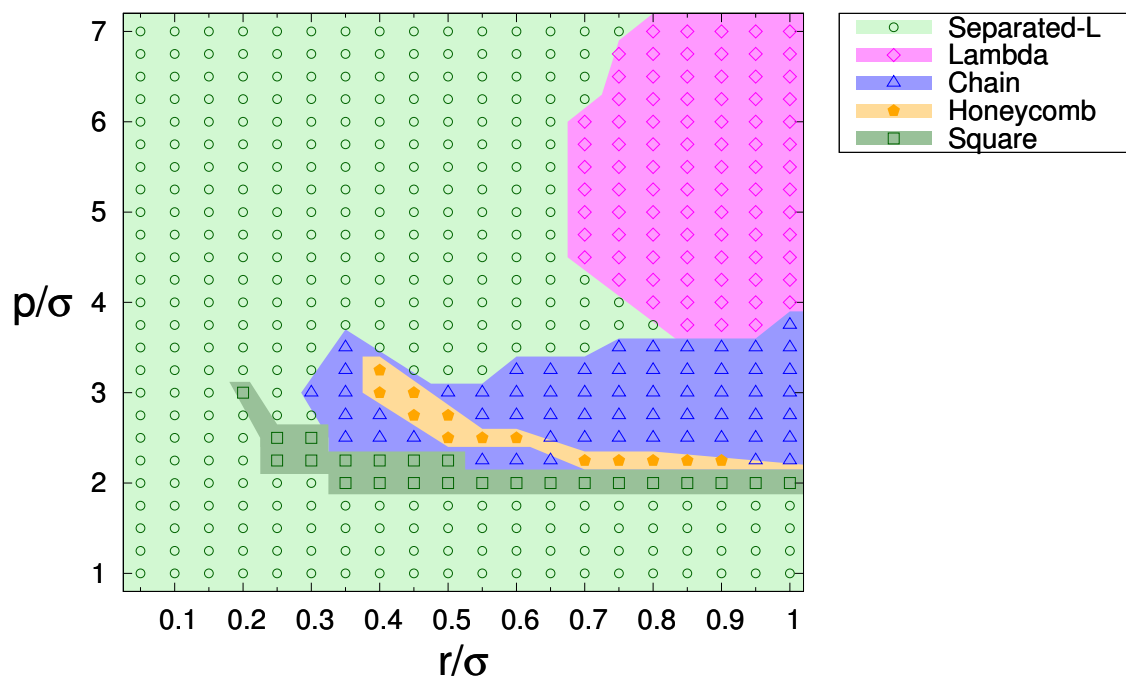

FIG. S1: Close-packed phase diagram of helices racemate obtained through MC annealing simulations.

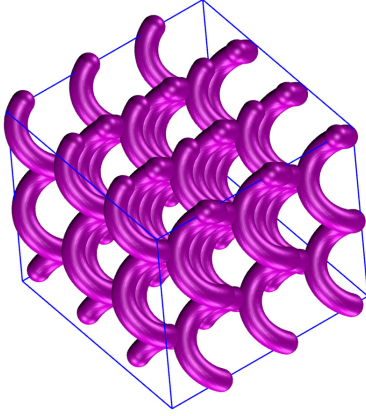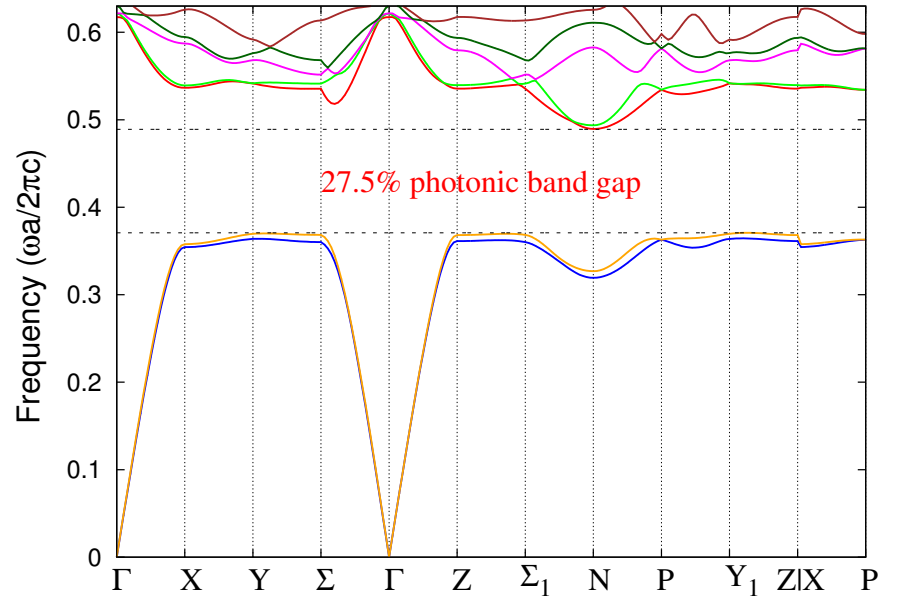

FIG. S2: Photonic band structures for bandgap-optimized half-square crystal with  $[r, p] = [0.9\sigma, 4.95\sigma]$  at dielectric contrast  $\epsilon_r = 12$ . This structure has diamond symmetry, i.e.,  $p = \sqrt{2}a$ .
